# Supplementary material for: Platelet-derived growth factor-BB promotes proliferation and migration of retinal microvascular pericytes by up-regulating the expression of C-X-C chemokine receptor types 4
Source: PubMed Central journal article supplement — Exp Ther Med. 2019 Sep 17;18(5):4022–30. doi: 10.3892/etm.2019.8016 (PMC6781788; doi:10.3892/etm.2019.8016), 2019-09-17

Figure S1. PDGF-BB treatment upregulated CXCR4 and CXCR7 protein expression in pericytes. (A) PDGF-BB treatment (24 h) increased CXCR4 and CXCR7 protein expression. (B) PDGF-BB treatment (10 ng/ml) increased CXCR4 and CXCR7 protein expression. Data are means  $\pm$  SD from three independent experiments. \* $P$ <0.05 vs. 0 ng/ml or 0 h. CXCR, C-X-C motif chemokine receptor; PDGF-BB, platelet-derived growth factor-BB.

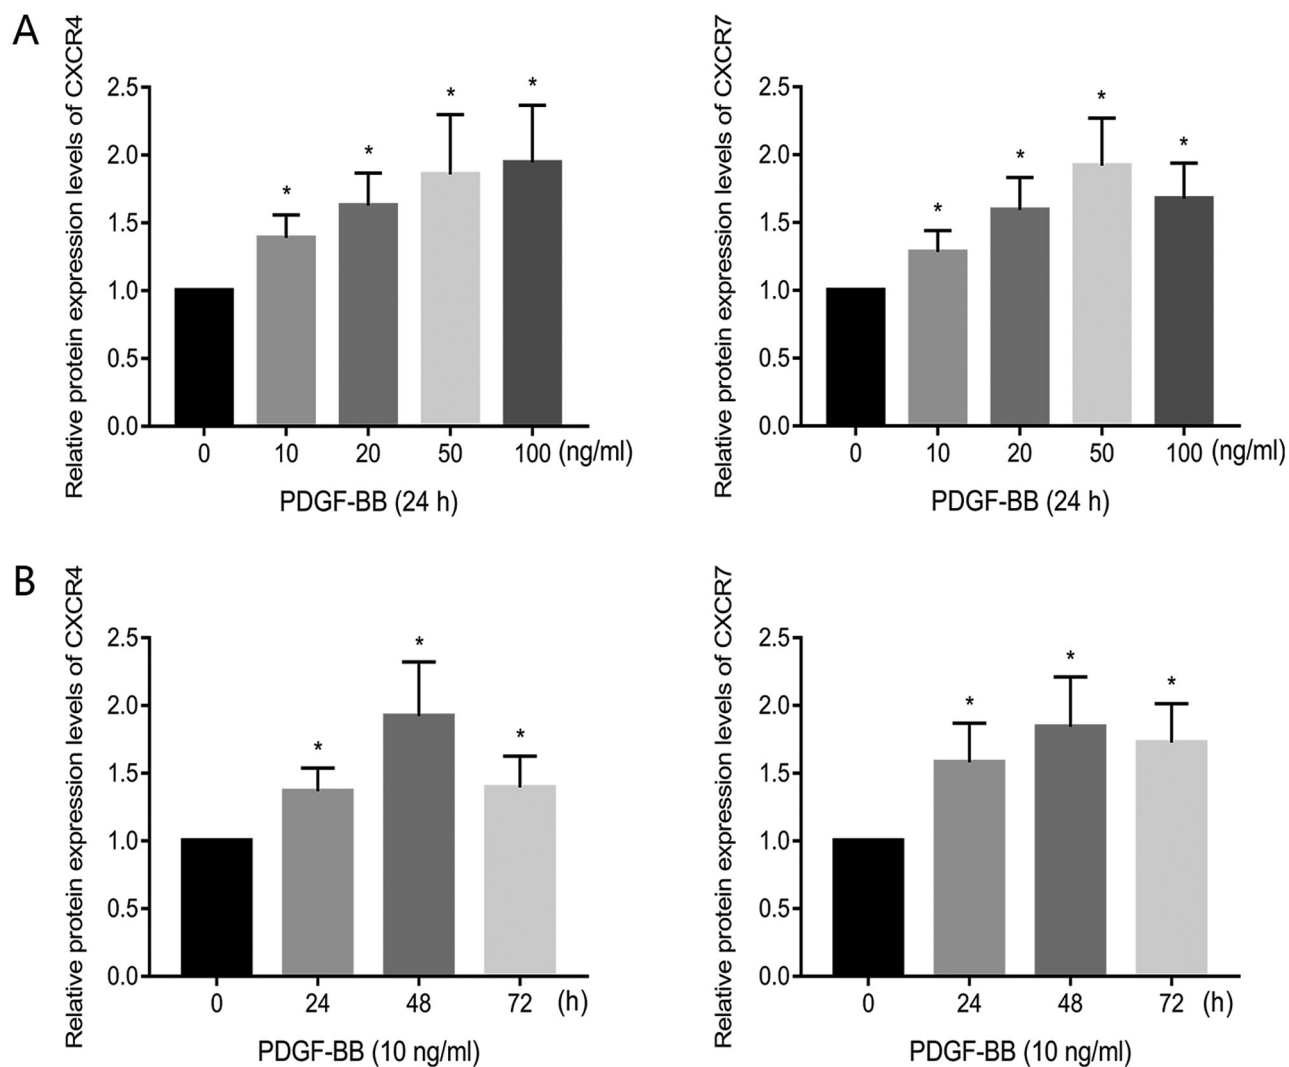

Supplement: Supplementary_Data.pdf [file Supplementary_Data.pdf]
